# Supplementary material for: Photophysical and anion sensing properties of a triphenylamine–dioxaborinine trimeric compound
Source: Royal Society of Chemistry journal article supplement (doi:10.1039/d2ra07498b), 2023-01-01
Supplement: d2ra07498b1.pdf [file d2ra07498b1.pdf]

## Electronic supplementary information (ESI)

### Photophysical and anions sensing properties of a triphenylamine–dioxaborinine trimeric compound

Alexis Tigreros,<sup>a</sup> Camilo Bedoya-Malagón,<sup>b</sup> Alejandra Valencia,<sup>b</sup> Mayerlin Núñez-Portela,<sup>b</sup> and Jaime Portilla\*<sup>a</sup>

<sup>a</sup> Bioorganic Compounds Research Group, Department of Chemistry, Universidad de Los Andes, Carrera 1 No. 18A-10, Bogotá 111711, Colombia

<sup>b</sup> Quantum Optics Laboratory, Department of Physics, Universidad de los Andes, Carrera 1 No. 18A-10, Bogotá, Colombia

\*E-mail: jportill@uniandes.edu.co; Tel: +57 1 3394949. Ext. 2080

## Contents

|                                                                |           |
|----------------------------------------------------------------|-----------|
| <b>1. Copies of NMR spectra .....</b>                          | <b>2</b>  |
| <b>2. HRMS and MS analysis.....</b>                            | <b>8</b>  |
| <b>3. Photophysical properties of compounds A1 and A2.....</b> | <b>9</b>  |
| <b>3.1. Catalán's multiparametric scale .....</b>              | <b>9</b>  |
| <b>3.2. Cyanide sensing properties of compound A2.....</b>     | <b>10</b> |
| <b>3.3. Two-photon absorption measurements .....</b>           | <b>12</b> |
| <b>References .....</b>                                        | <b>13</b> |

# 1. Copies of NMR spectra

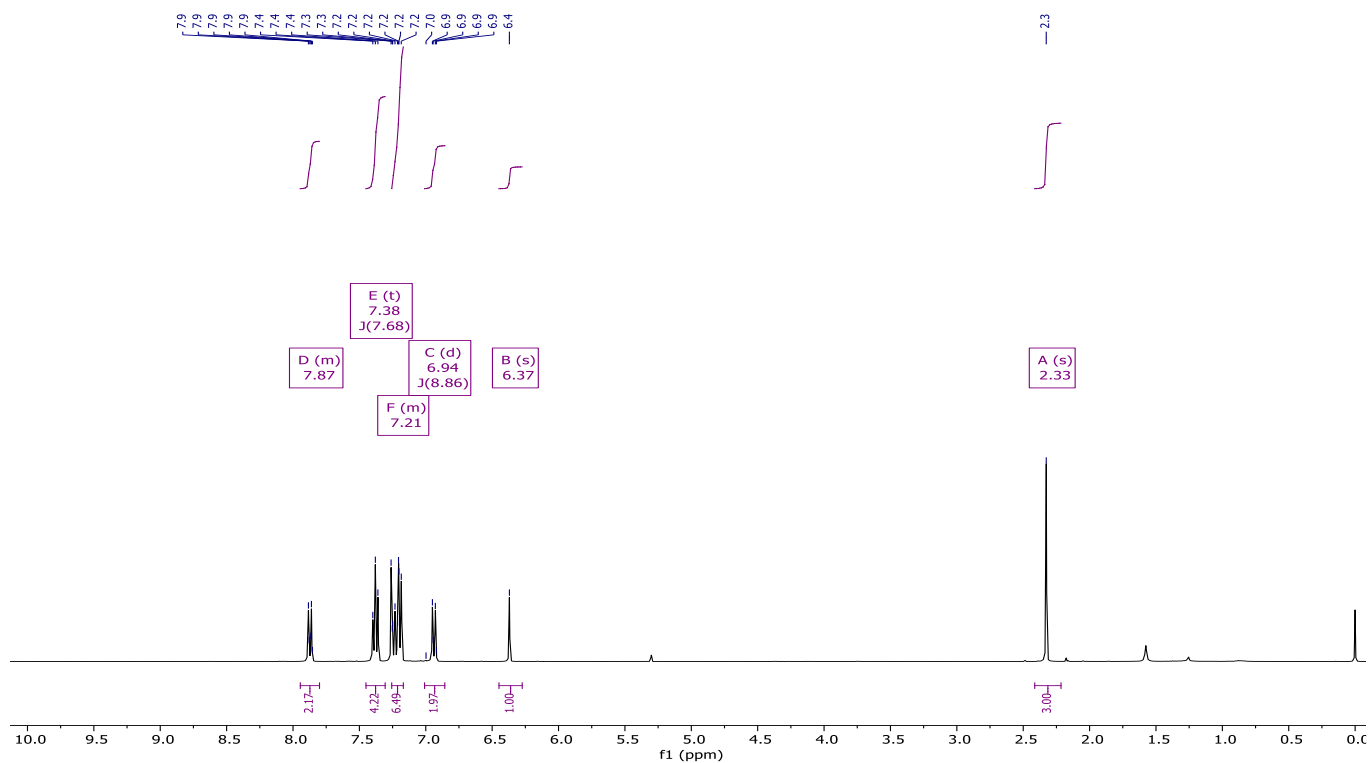

Fig. S1  $^1\text{H}$  NMR spectrum for compound A1 in  $\text{CDCl}_3$  (400 MHz).

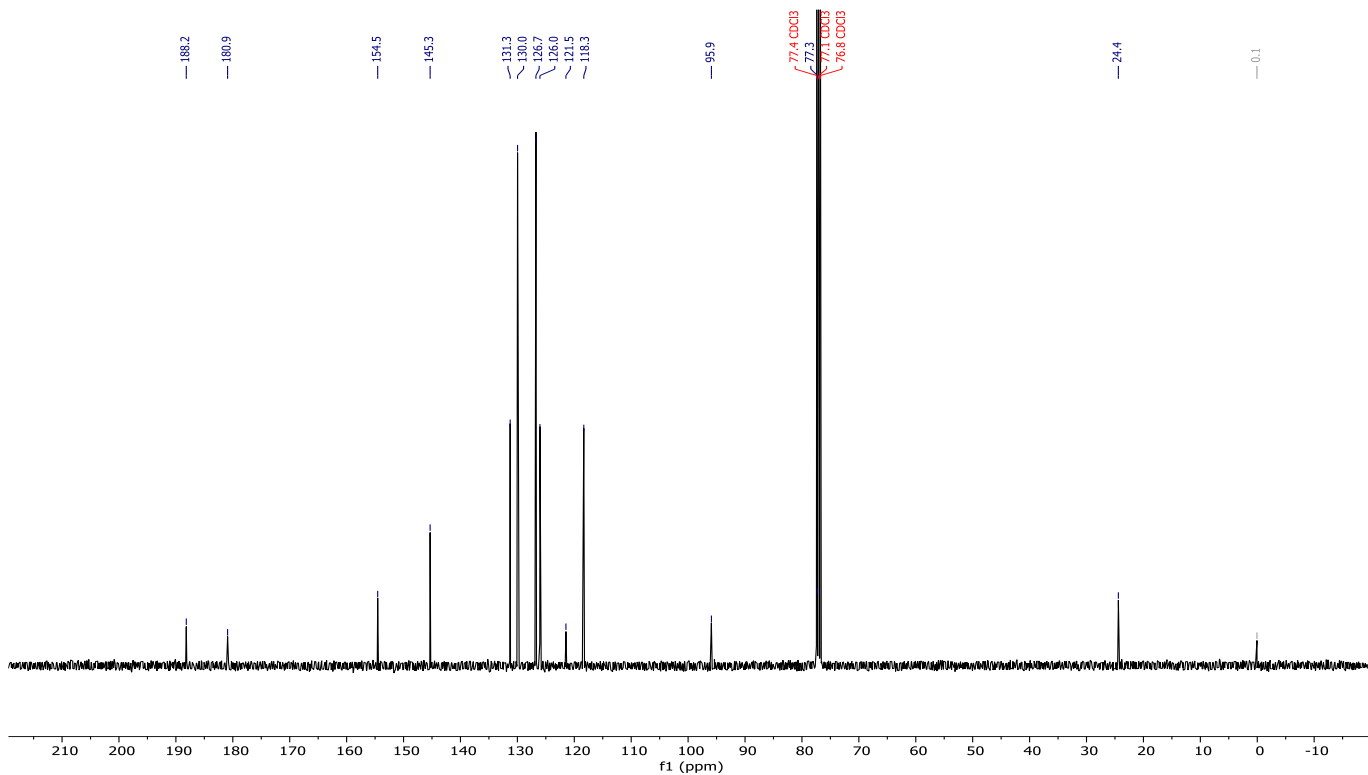

Fig. S2  $^{13}\text{C}$  NMR spectrum for compound A1 in  $\text{CDCl}_3$  (100 MHz).

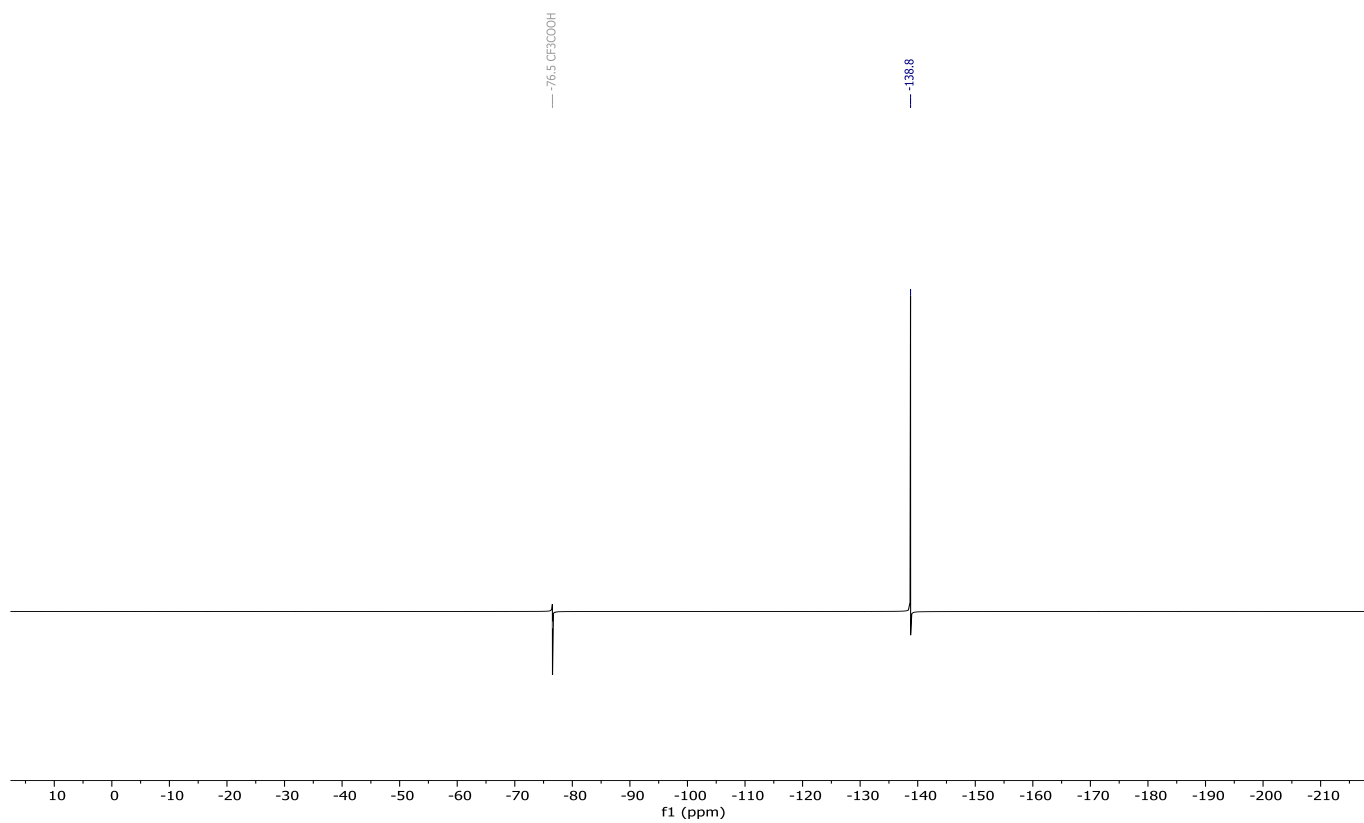

**Fig. S3**  $^{19}\text{F}$  NMR spectrum for **A1** in  $\text{CDCl}_3$  (374 MHz) using TFA as internal standard.

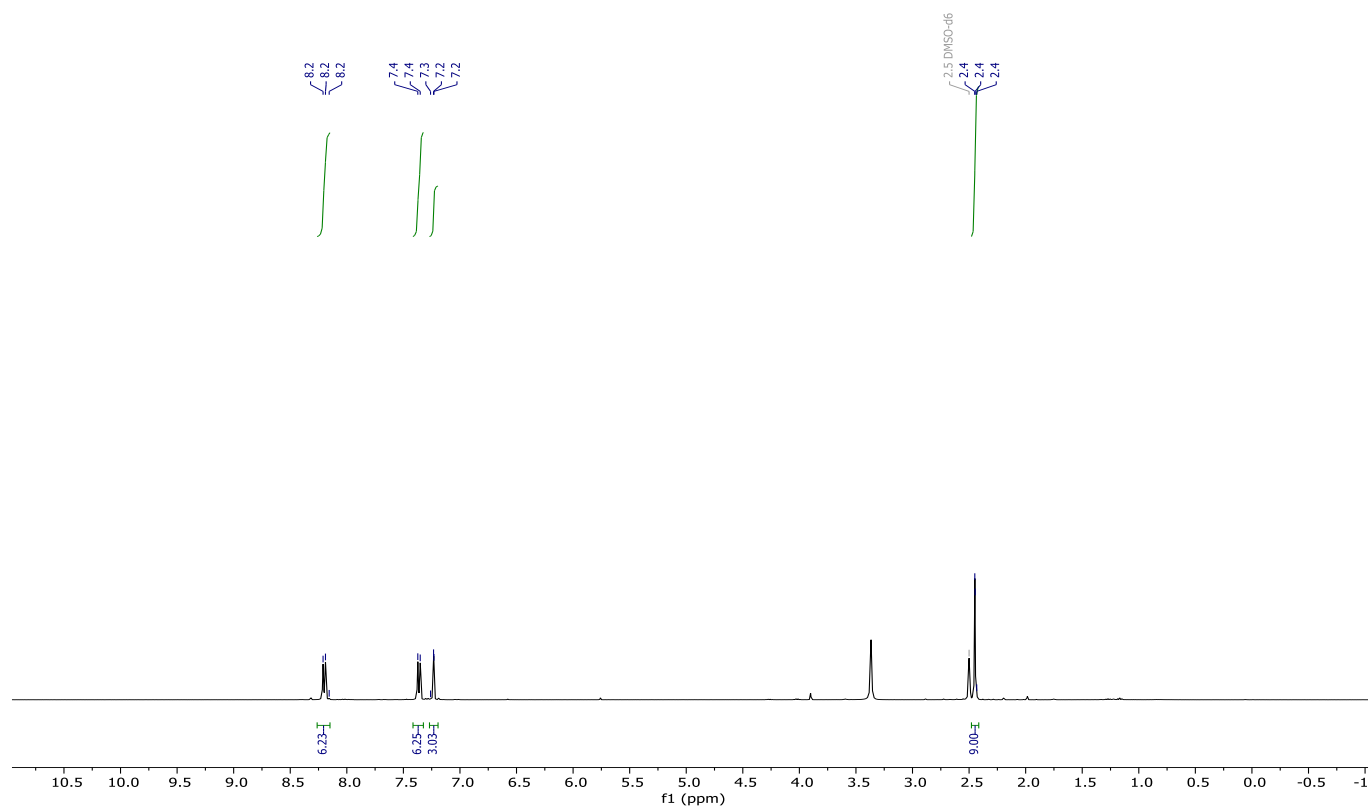

**Fig. S4**  $^1\text{H}$  NMR spectrum for compound **A2** in  $\text{DMSO}-d_6$  (400 MHz).

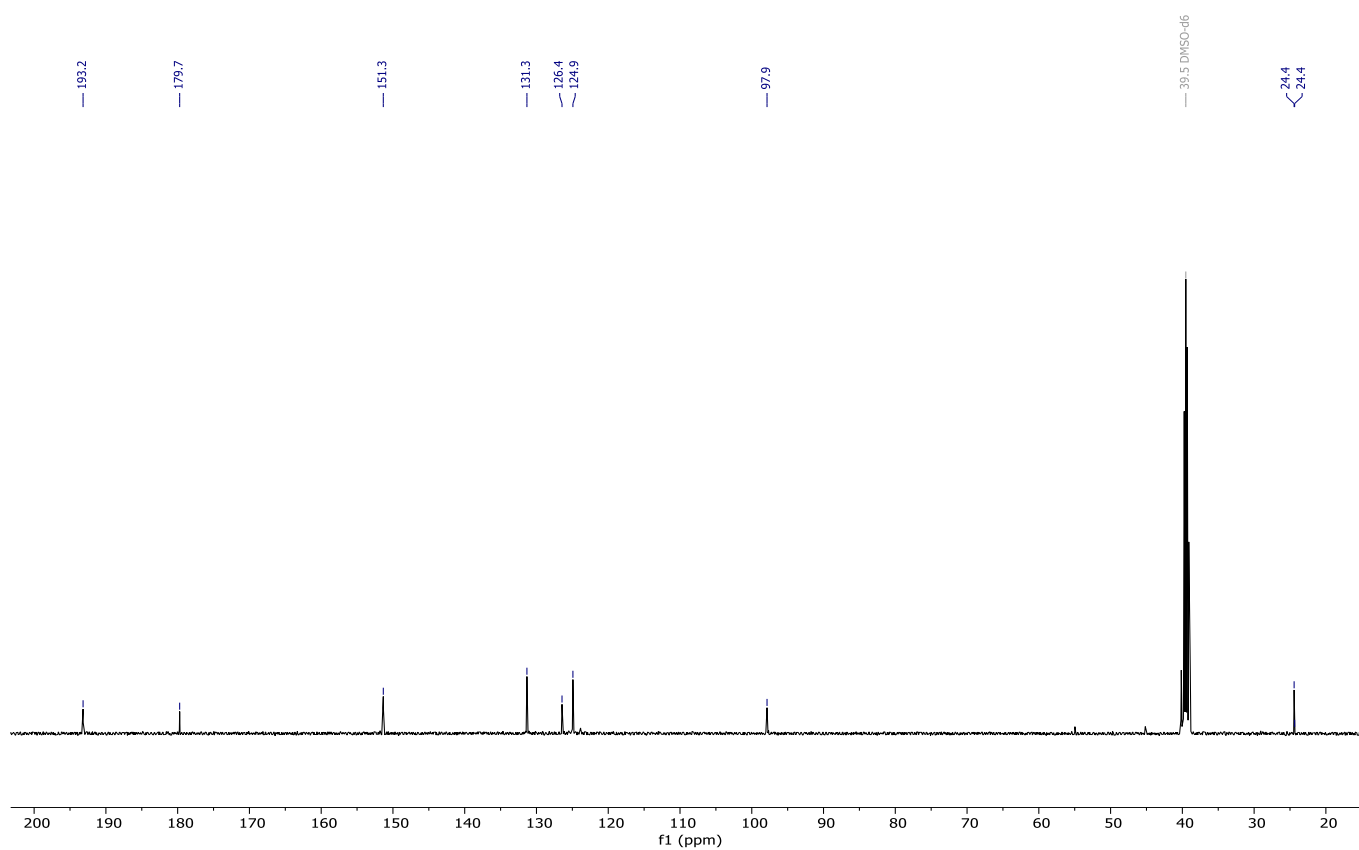

Fig. S5  $^{13}\text{C}$  NMR spectrum for compound **A2** in  $\text{DMSO-}d_6$  (100 MHz).

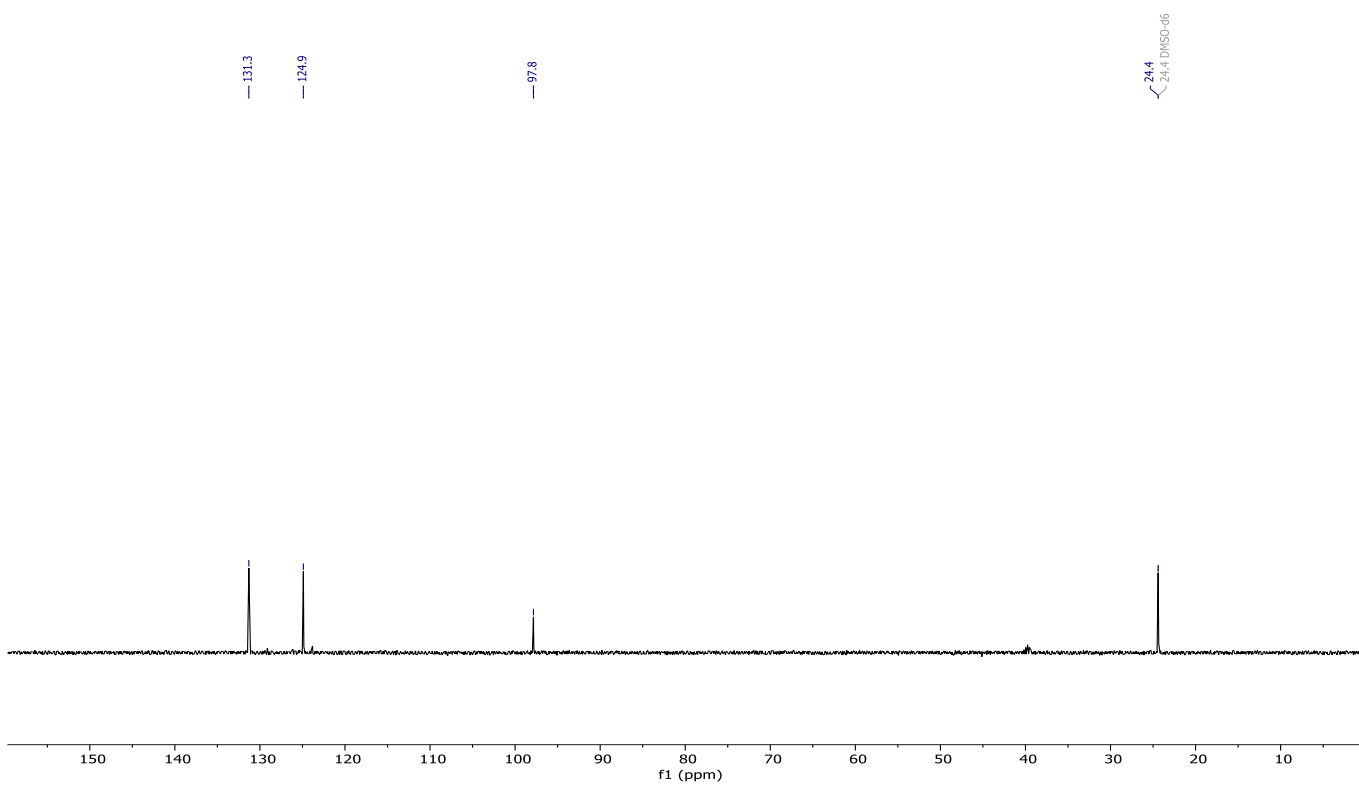

Fig. S6 DEPT-135 spectrum for compound **A2** in  $\text{DMSO-}d_6$  (100 MHz).

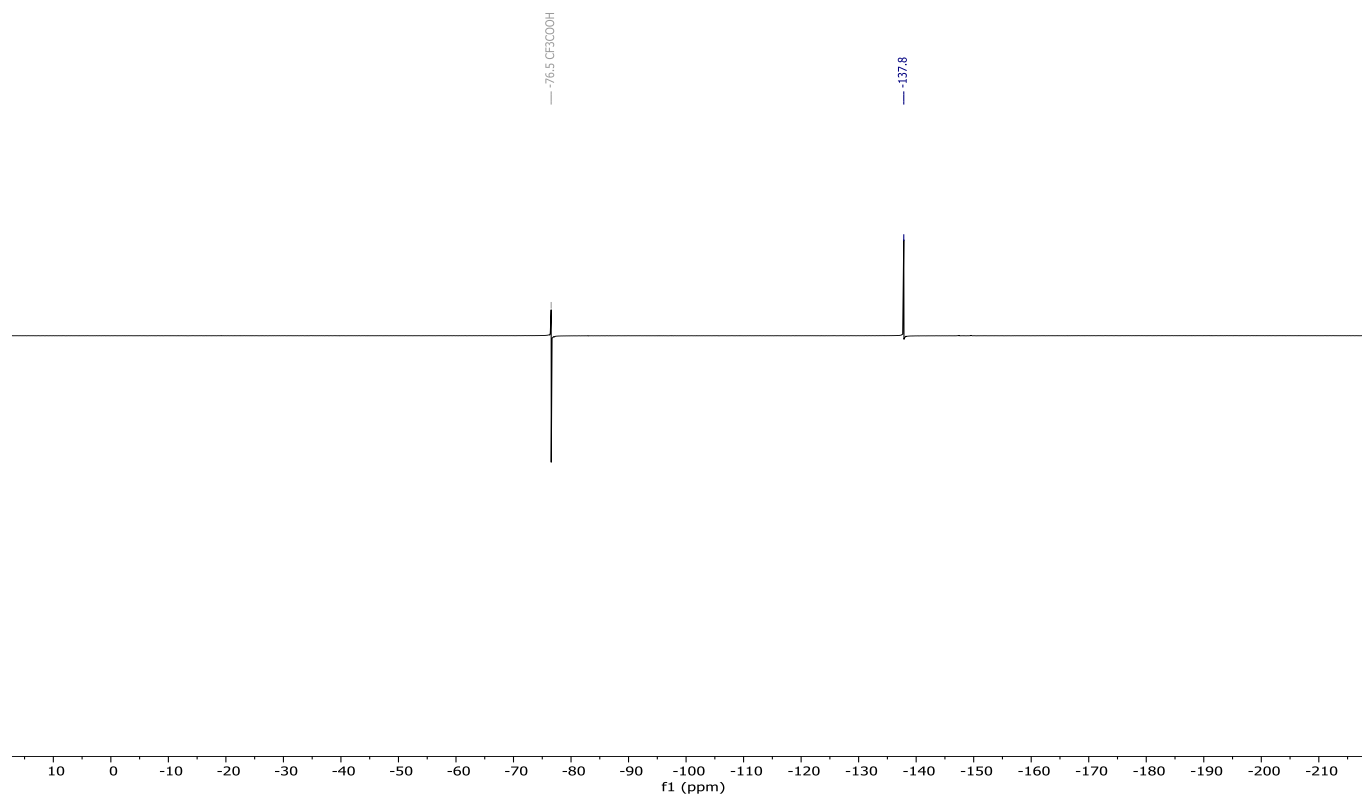

**Fig. S7.**  $^{19}\text{F}$  NMR spectrum for **A2** in  $\text{DMSO}-d_6$  (374 MHz) using TFA as an internal standard.

## 2. HRMS and MS analysis

|                               |                |                      |                               |
|-------------------------------|----------------|----------------------|-------------------------------|
| <b>Data Filename</b>          | ATO-6.d        | <b>Sample Name</b>   | ATO-6                         |
| <b>Sample Type</b>            | Sample         | <b>Position</b>      | P1-F6                         |
| <b>Instrument Name</b>        | Instrument 1   | <b>User Name</b>     |                               |
| <b>Acq Method</b>             | Default 2021.m | <b>Acquired Time</b> | 7/1/2022 1:55:27 PM           |
| <b>IRM Calibration Status</b> | Success        | <b>DA Method</b>     | Metodo-analisis-signalnoise.m |
| <b>Comment</b>                |                |                      |                               |

Sample Group      Info.

### User Chromatograms

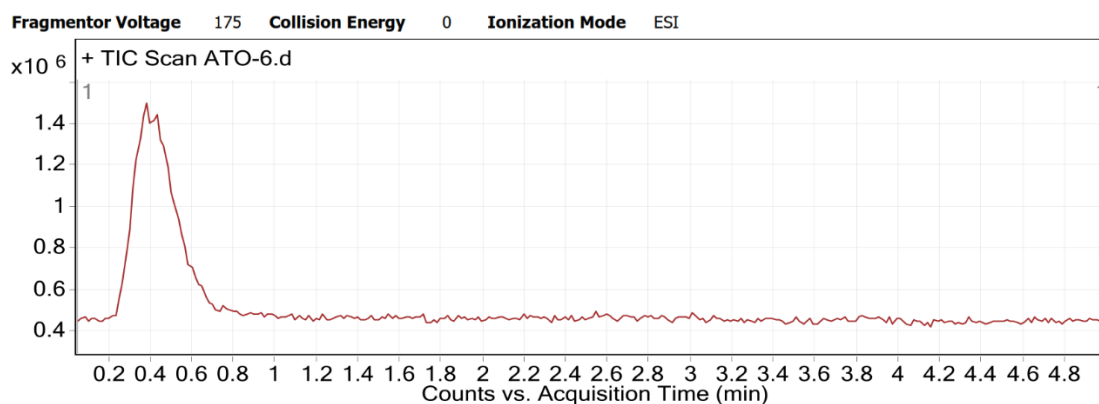

### User Spectra

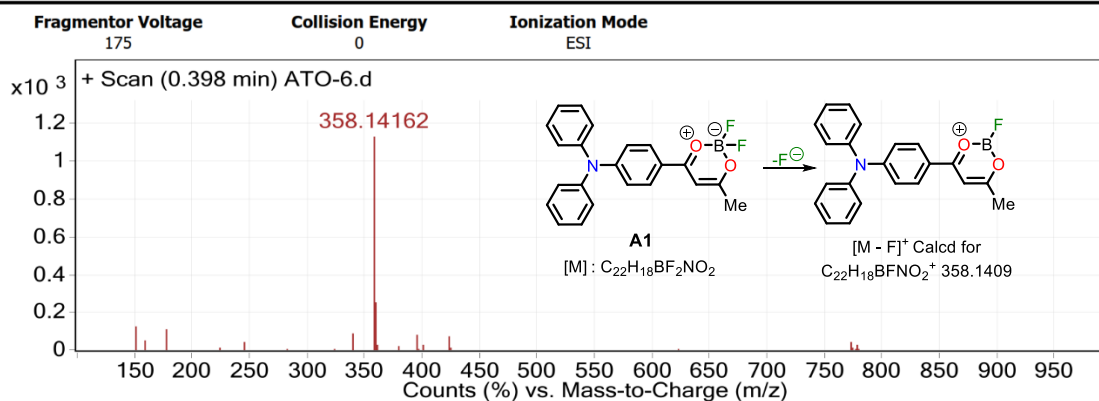

#### Peak List

| m/z       | z | Abund    |
|-----------|---|----------|
| 150.02652 |   | 37686.3  |
| 158.15358 |   | 16670.3  |
| 177.05479 |   | 32164.6  |
| 338.3415  |   | 27140.6  |
| 357.14381 |   | 70412.1  |
| 358.14162 | 1 | 309354.9 |
| 358.29809 |   | 16875.6  |
| 359.14394 | 1 | 72178.1  |

Fig. S8 HRMS analysis for compound A1.

|                               |                |                      |                                 |
|-------------------------------|----------------|----------------------|---------------------------------|
| <b>Data Filename</b>          | ATO-7 2.d      | <b>Sample Name</b>   | ATO-7                           |
| <b>Sample Type</b>            | Sample         | <b>Position</b>      | P1-F7                           |
| <b>Instrument Name</b>        | Instrument 1   | <b>User Name</b>     |                                 |
| <b>Acq Method</b>             | Default 2021.m | <b>Acquired Time</b> | 7/1/2022 5:06:53 PM             |
| <b>IRM Calibration Status</b> | Success        | <b>DA Method</b>     | Metodo-analisis-signaltonoise.m |
| <b>Comment</b>                |                |                      |                                 |

Sample Group      Info.

### User Chromatograms

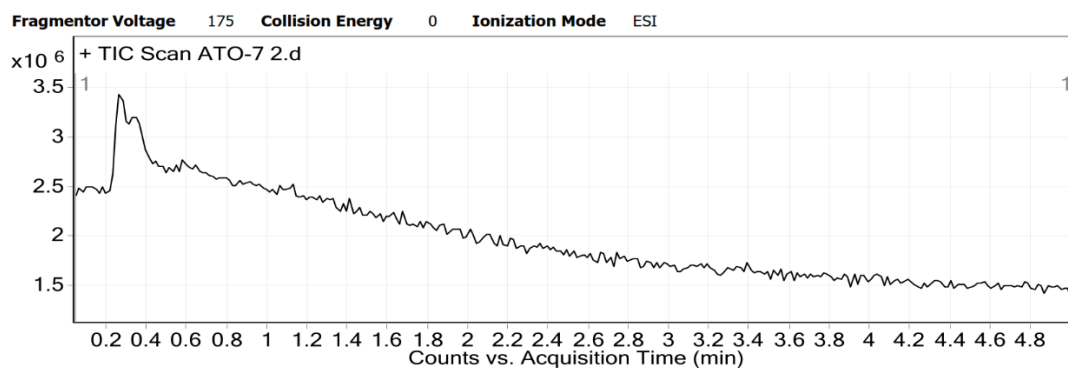

### User Spectra

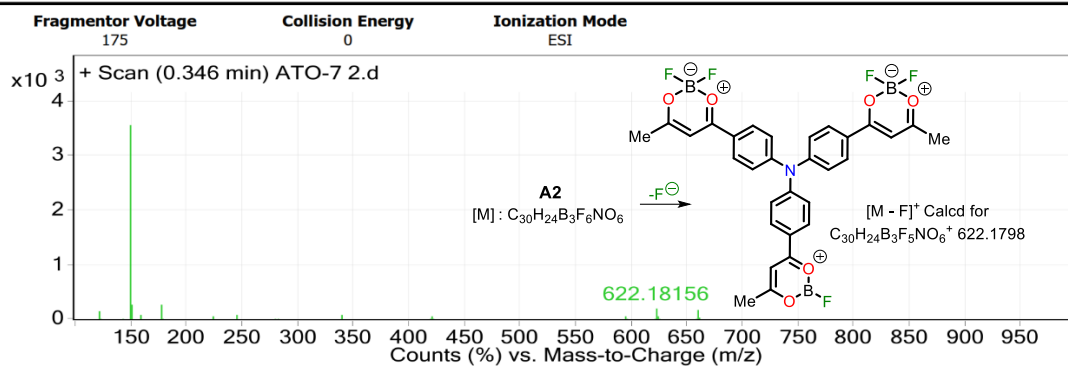

### Peak List

| <i>m/z</i> | <i>z</i> | Abund    |
|------------|----------|----------|
| 121.02966  |          | 48074.2  |
| 149.02399  | 1        | 951837.1 |
| 149.05495  |          | 51891.7  |
| 150.02696  | 1        | 76982.4  |
| 177.05474  |          | 76592.2  |
| 622.18156  |          | 59360.9  |
| 659.21687  |          | 54362    |

Fig. S9 HRMS analysis for compound A2.

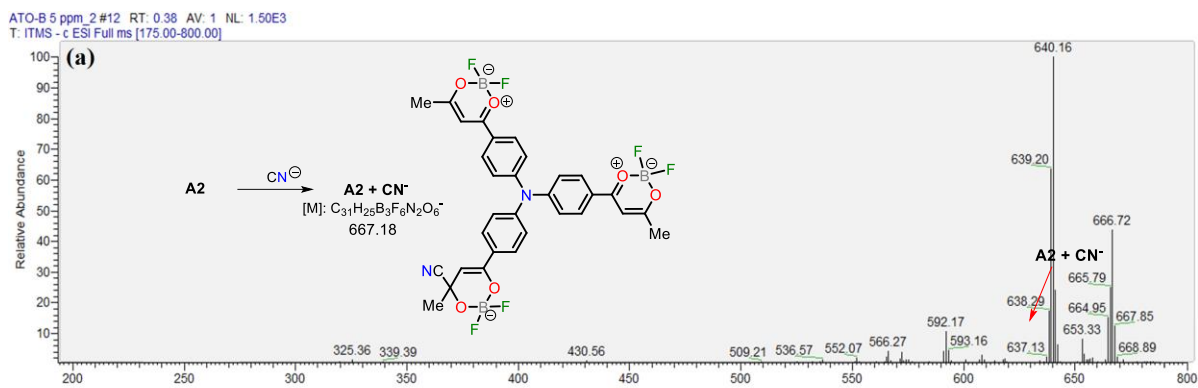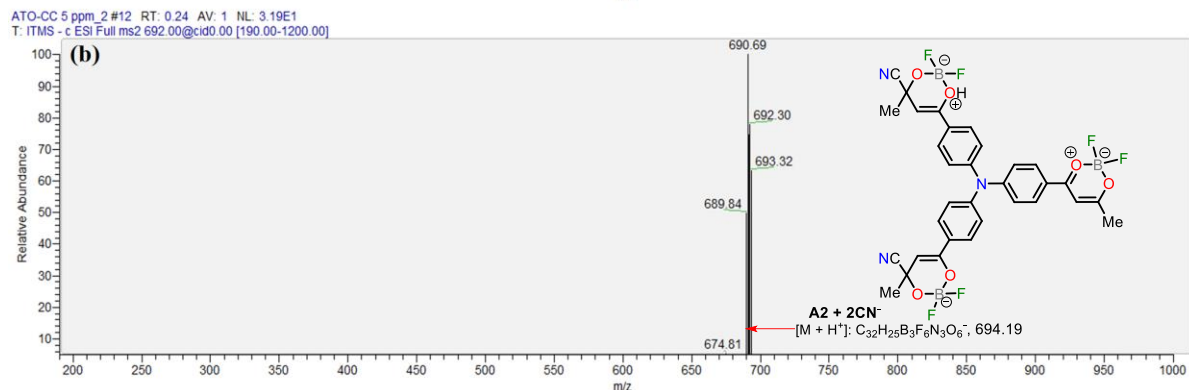

**Fig. S10** MS analysis for **A2** upon addition of a) 0.5 equiv and b) 2.0 equiv of Bu<sub>4</sub>N<sup>+</sup>CN<sup>-</sup> in MeCN.

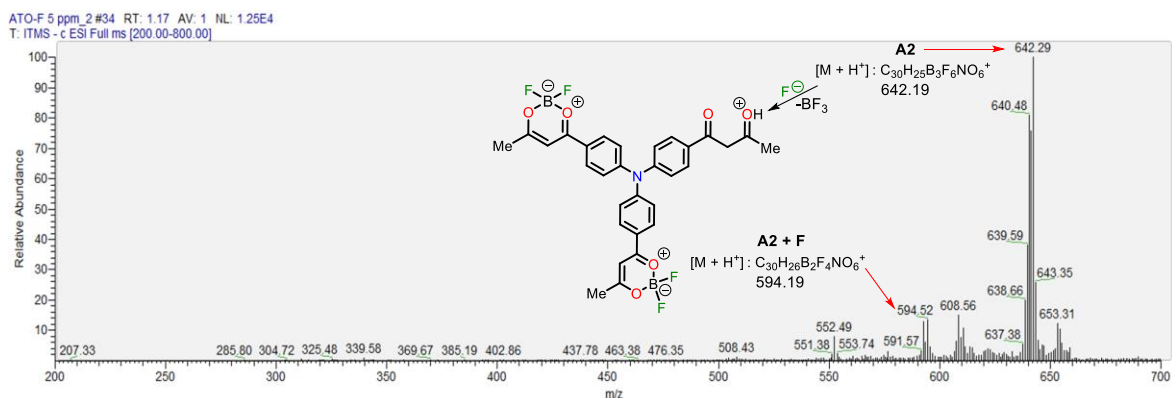

**Fig. S11** MS analysis for **A2** upon addition of 1.0 equiv of Bu<sub>4</sub>N<sup>+</sup>F<sup>-</sup> in MeCN. Ion-trap using positive ion mode.



### 3. Photophysical properties of compounds A1 and A2

#### 3.1. Catalán's multiparametric scale

**Table S1.** Catalán solvent parameters and emission maximum wavelengths of **A1** and **A2**.<sup>a</sup>

| Solvent           | SP    | SdP   | SA    | SB    | A1, Emax (cm <sup>-1</sup> ) | A2, Emax (cm <sup>-1</sup> ) |
|-------------------|-------|-------|-------|-------|------------------------------|------------------------------|
| TBME              | 0.622 | 0.422 | 0.000 | 0.567 | 21692                        | 20661                        |
| MePh              | 0.782 | 0.284 | 0.000 | 0.128 | 21413                        | 20325                        |
| THF               | 0.714 | 0.634 | 0.000 | 0.591 | 21277                        | 19608                        |
| EA                | 0.656 | 0.603 | 0.000 | 0.542 | 21276                        | 19157                        |
| CHCl <sub>3</sub> | 0.614 | 0.783 | 0.047 | 0.071 | 20833                        | 18832                        |
| DMF               | 0.759 | 0.977 | 0.031 | 0.613 | 20325                        | 17637                        |
| MeCN              | 0.645 | 0.974 | 0.044 | 0.286 | 20325                        | 17391                        |

<sup>a</sup>Experiments were carried out in various solvents of different polarities. EA = ethyl acetate, Emax = Emission maximum.

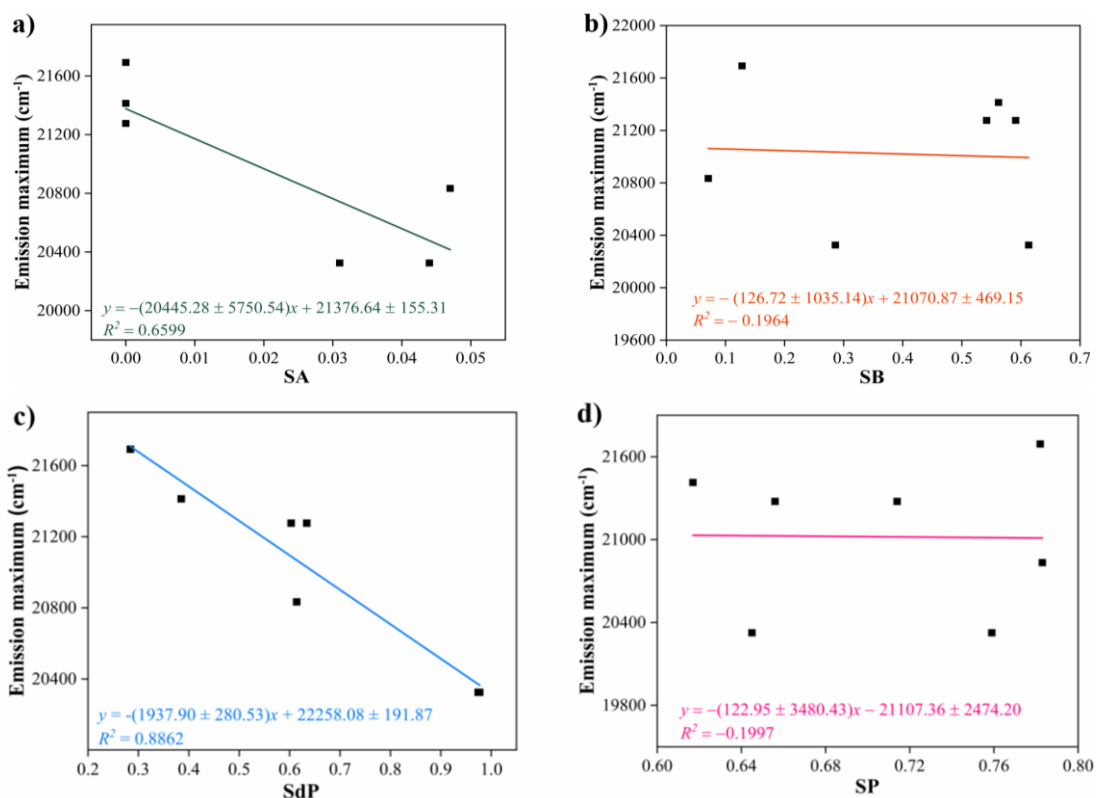

**Fig. S12** Plots of emission maximum vs. a) Solvent dipolarity (SdP), b) Solvent polarizability (SP), c) Solvent acidity (SA), and d) Solvent basicity (SB) for compound **A1**.

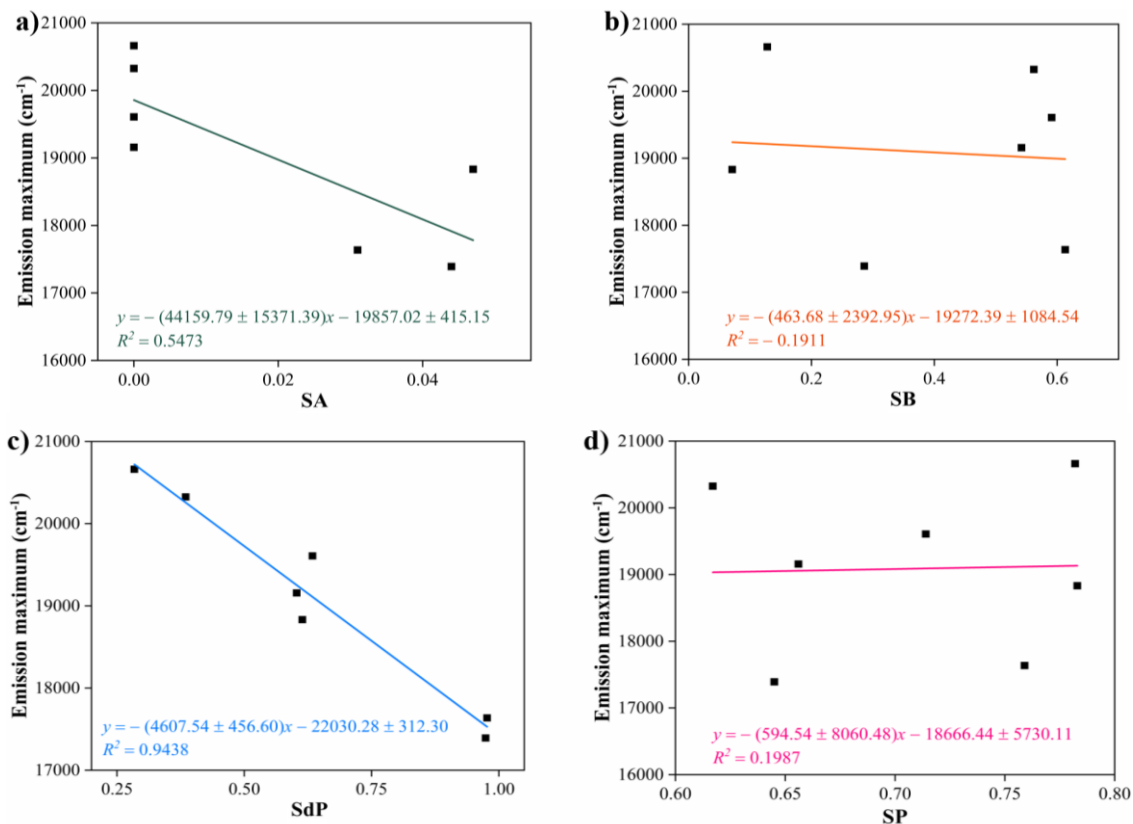

**Fig. S13** Plots of emission maximum vs. a) Solvent dipolarity (SdP), b) Solvent polarizability (SP), c) Solvent acidity (SA), and d) Solvent basicity (SB) for compound **A2**.

### 3.2. Cyanide sensing properties of compound **A2**

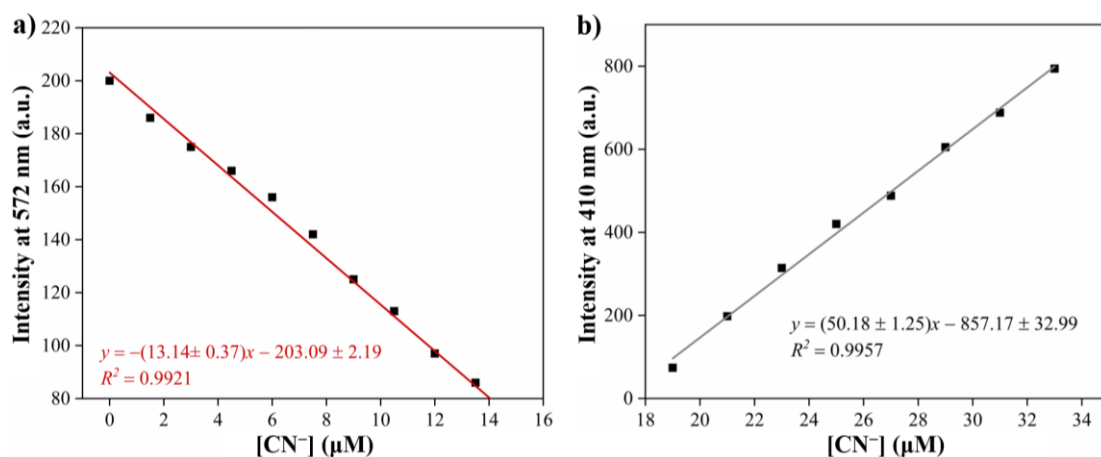

**Fig. S14** Linear plot of emission intensities of **A2** (10 μM) in acetonitrile solution in the presence of CN<sup>-</sup> a) concentration range of CN<sup>-</sup> 0-10 μM and b) 19-33 μM

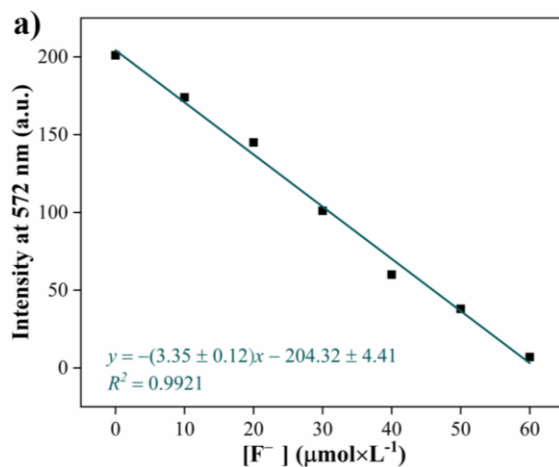

**Fig. S15** Linear plot of emission intensity of **A2** (10  $\mu\text{M}$ ) in MeCN for  $F^-$  (0-60  $\mu\text{M}$ ).

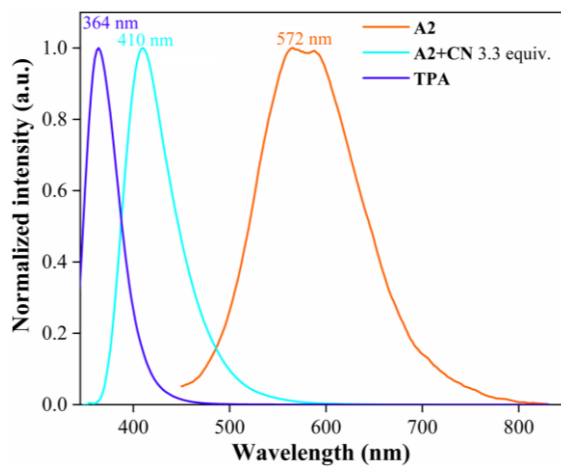

**Fig. S16** Normalized emission spectra of **A2**, **A2** + 3.3 equiv of **CN** and triphenylamine (**TPA**) in MeCN at 20 °C,  $\lambda_{\text{ex}} = 350 \text{ nm}$  for **A2** and **A2** + **CN**, and  $\lambda_{\text{ex}} = 300 \text{ nm}$  for **TPA**.

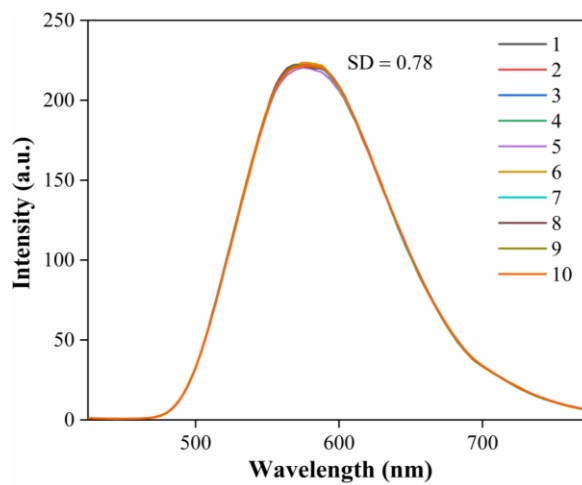

**Fig. S17** Ten emission spectra measurements for LOD of  $\text{CN}^-$  and  $F^-$  determination of **A2**.

### 3.3. Two-photon absorption measurements

To measure the two-photon induced fluorescence in compounds **A1** and **A2**, an external cavity diode laser (ECDL) in Littrow configuration at 817 nm is used to excite the two-photon transition. The light beam was focused on the sample using a microscope objective (Edmund Optics 58-373). Different probe concentrations in THF were contained in a 1 mm thick quartz cuvette. The cuvette was placed on a translation stage allowing small and precise sample movements along the laser light path. The translational stage permits pinpointing the focal point of the laser light inside the sample by performing a z-scan. The emission is detected as a function of the position of the sample by a photomultiplier tube (PMT Hamamatsu R5929).<sup>1</sup> The fluorescence signal maximum is reported as fluorescence in Fig. 6. Spectral filters remove the scatter of infrared light from the excitation laser.

The excitation action cross section is obtained from the fitting parameters in Figure 6a-b and Eq. 3. For laser light  $g = 1$ , the overall fluorescence collection efficiency is  $\eta = 0.0018 \pm 0.0002$  for **A1** and  $\eta = 0.0011 \pm 0.0002$  for **A2**, depending on the spectral sensitivity of the PMT, and the refractive index for THF is  $n = 1.4072$ . The experimental technique was verified by measuring the two-photon absorption cross-section ( $\delta$ ) in Rhodamine B in methanol. Table S2 shows the value of the TPA cross section measured in this work compared to previously reported values. The values show that the technique employed in this work allows for the measurement of two-photon absorption cross sections.

**Table S2** Reported values of Two-photon absorption cross sections for Rhodamine in MeOH.

| Concentration | $\lambda$ (nm) | $\delta$ (GM) | Reference    |
|---------------|----------------|---------------|--------------|
| 0.05 mM       | 817            | 6.8±1.8       | This work    |
| 0.001 mM      | 798            | 12.2          | <sup>2</sup> |
| 0.0382 mM     | 802            | 10.4          | <sup>3</sup> |

It is important to note that the respective representative diagrams of the z-scan system (Fig. S7a) and the fluorescence process (Fig. S7b) were made to clarify the optical route by which the fluorescence induced by two-photon occurs in the studied compounds.

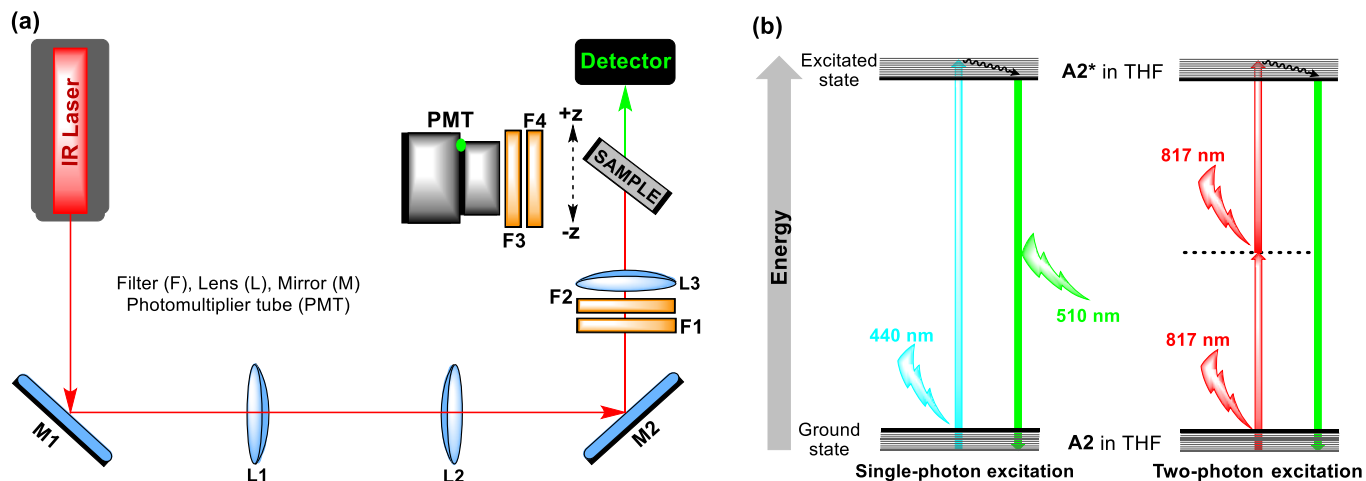

**Fig. S18** a) Experimental setup to measure the two-photon absorption excitation action cross section. b) Jablonski diagrams showing the single-photon (left) and two-photon (right) excitations for compound **A2** in THF.

## References

1. C. B. Malagon, M. Pellaton, A. Tigreros, J. Portilla, A. Valencia and M. Nunñez Portela, in *OSA Nonlinear Optics 2021*, ed. R. Boyd Conti, C., Christodoulides, D., and Rakich, P., Optica Publishing Group, Washington, DC, 2021, p. NTh3A.13.
2. C. Xu and W. W. Webb, *Journal of the Optical Society of America B*, 1996, **13**, 481–491.
3. D. A. Oulianov, I. V Tomov, A. S. Dvornikov and P. M. Rentzepis, *Optics Communications*, 2001, **191**, 235–243.
